# Supplementary material for: Noisy Interlimb Coordination Can Be a Main Cause of Freezing of Gait in Patients with Little to No Parkinsonism
Source: PLoS One. 2013 Dec 31;8(12):e84423. doi: 10.1371/journal.pone.0084423 (PMC3877290; doi:10.1371/journal.pone.0084423)
Supplement: Table S2 — Gait parameters of each patient during straight walking. (XLSX) [file pone.0084423.s004.xlsx]

## Sheet: Table S2
TABLE S2. Gait parameters of each patient during straight walking
Patients	Go						Back
	stride time CV	φCV	φ_deviation	slope_mean	φ_ asymmetry	∆φ_error	stride time CV	φCV	φ_deviation	slope_mean	φ_ asymmetry	∆φ_error
FOG 1	5.3994	3.9341	4.3212	-1.50195	5.14548	12.5418	4.2849	3.7582	3.72373	-1.49028	5.14447	43.1897
FOG 2	2.2801	2.0068	2.4845	-1.55375	2.57933	6.73421	2.13207	2.8715	3.1554	-1.4975	3.43368	9.21786
FOG 3	2.5039	1.6499	1.336	-1.42559	1.16923	5.34566	3.22895	2.91012	2.3522	-1.50078	1.80421	22.3878
FOG 4	6.2803	4.8553	4.1664	-1.30021	2.8642	13.6926	11.75	6.1968	5.453	-1.35481	6.59631	34.6841
FOG 5	3.9898	2.8817	2.8794	-1.33633	3.35351	9.14751	3.7186	3.18465	3.08998	-1.27413	4.42227	9.47541
FOG 6	3.0017	3.3873	2.7205	-1.58705	1.94007	8.09554	4.11367	3.7611	4.3315	-1.628	3.87685	42.3958
FOG 7	4.06035	3.05157	2.5611	-1.51097	1.32026	9.68481	3.82812	3.16792	3.56055	-1.56658	3.35923	40.1518
FOG 8	2.0707	3.7292	3.4563	-1.61929	2.09557	7.65827	2.63453	3.06433	2.89233	-1.42922	2.07364	9.50143
FOG 9	2.6164	3.3908	2.9514	-1.57547	0.9761	7.82382	2.54387	2.0267	2.64672	-1.50859	2.89925	7.50327
PD 1	2.6979	3.4402	4.4251	-1.54204	5.14487	8.708	2.1847	3.549	3.0079	-1.70312	1.60509	6.68701
PD 2	1.1605	2.8114	4.1283	-1.76519	1.81792	6.08952	2.93775	3.11675	4.8663	-1.54468	4.6684	10.301
PD 3	3.5636	3.725	3.5503	-1.46478	3.49004	9.34071	2.7539	3.8758	3.6925	-1.66978	1.72328	10.3214
PD 4	1.81275	2.32935	1.92875	-1.52723	1.03527	5.19163	1.91413	3.27917	2.59817	-1.73306	1.04428	5.82016
PD 5	1.5533	2.1148	3.8534	-1.65887	2.9851	5.00661	2.1358	2.71367	4.49408	-1.66248	2.93978	6.21015
PD 6	1.3465	1.23064	0.950312	-1.44152	0.701628	3.12885	2.25935	1.66805	1.47125	-1.41356	0.947212	5.3574
PD 7	7.9732	2.9916	3.7798	-1.6244	3.00621	14.3774	4.14415	3.38705	3.6944	-1.64427	2.66102	11.2772
PD 8	1.22699	1.3653	1.2062	-1.44723	0.443851	3.26615	1.65136	1.31925	1.28163	-1.59997	1.57867	4.7564
PD 9	2.0893	2.58485	2.69622	-1.56066	1.82506	5.98123	2.39685	2.18473	2.58247	-1.55927	2.83225	7.61011
PD 10	1.27261	1.7215	1.94705	-1.67673	1.09067	3.93374	1.53222	1.25937	1.4239	-1.55033	1.66737	4.12763
PD 11	2.40095	2.5653	4.005	-1.60572	3.61814	7.37372	3.07335	1.8061	4.03673	-1.42378	6.78391	8.52598
FOG 1-9: Patients with freezing of gait (FOG) with little to no parkinsonism.
PD 1-11: Patients with Parkinson's disease without FOG.
